# Supplementary material for: Enhanced high-strength, temperature-resistant PVA hydrogel sensors with silica/xanthan/glycerol for posture monitoring and handwriting recognition using deep learning
Source: Royal Society of Chemistry journal article supplement (doi:10.1039/d4tc02804j), 2024-01-01
Supplement: d4tc02804j1.pdf [file d4tc02804j1.pdf]

# Support Information

## **Enhanced High-Strength, Temperature-Resistant PVA Hydrogel Sensors with Silica/Xanthan/Glycerol for Posture Monitoring and Handwriting Recognition Using Deep Learning**

Fanchen Luo <sup>a</sup>, Yafei Qin <sup>\*,a</sup>, Xi Wang <sup>a</sup>, Xuanmo Zhao <sup>a</sup>, Kedi Chen <sup>a</sup>,  
Weichen Huang <sup>a</sup>

<sup>a</sup> Faculty of Mechanical and Electrical Engineering, Kunming University of  
Science and Technology, Kunming 650500, China.

\* E-mail: [qinyafei\\_kmust@foxmail.com](mailto:qinyafei_kmust@foxmail.com)

17

18

19

20 **Table S1** statistics of mechanical properties of hydrogels with different  
21 compositions

---

| <b>Sample code</b> | <b>Elongation at break</b> | <b>Tensile strength</b> | <b>Young's Modulus</b> | <b>Toughness (MJ/m<sup>3</sup>)</b> |
|--------------------|----------------------------|-------------------------|------------------------|-------------------------------------|
| <b>PVA</b>         | 268                        | 0.527                   | 0.57                   | 0.61                                |
| <b>PL</b>          | 378                        | 0.416                   | 0.61                   | 0.63                                |
| <b>PLX</b>         | 438                        | 0.604                   | 0.98                   | 1.109                               |
| <b>PLXS</b>        | 611                        | 0.943                   | 1.12                   | 2.37                                |
| <b>PLXSG</b>       | 796                        | 1.816                   | 1.768                  | 6.09                                |

---

22

23

24

25

26 **Table S2** Statistics on the mechanical properties of hydrogels at different  
27 silica concentrations

28

---

| <b>Sample<br/>code</b>    | <b>Elongation<br/>at break</b> | <b>Tensile<br/>strength</b> | <b>Young's<br/>Modulus</b> | <b>Toughness<br/>(MJ/m<sup>3</sup>)</b> |
|---------------------------|--------------------------------|-----------------------------|----------------------------|-----------------------------------------|
| <b>PLXSG<sub>0</sub></b>  | 414                            | 0.813                       | 1.815                      | 1.80                                    |
| <b>PLXSG<sub>1</sub></b>  | 689                            | 1.163                       | 1.392                      | 4.53                                    |
| <b>PLXSG<sub>5</sub></b>  | 796                            | 1.817                       | 1.768                      | 6.09                                    |
| <b>PLXSG<sub>10</sub></b> | 612                            | 2.610                       | 4.336                      | 8.579                                   |

---

29

30

31

32 **Table S3** Statistics of mechanical properties of PLXSG hydrogels at  
33 different temperatures

---

| <b>Temperature (°C)</b> | <b>Elongation at break</b> | <b>Tensile strength</b> | <b>Young's Modulus</b> | <b>Toughness (MJ/m<sup>3</sup>)</b> |
|-------------------------|----------------------------|-------------------------|------------------------|-------------------------------------|
| <b>-40</b>              | 918                        | 1.235                   | 1.268                  | 5.69                                |
| <b>0</b>                | 807                        | 1.688                   | 1.615                  | 6.01                                |
| <b>25</b>               | 796                        | 1.817                   | 1.768                  | 6.09                                |
| <b>70</b>               | 625                        | 4.219                   | 7.56                   | 8.83                                |

---

34

35

36 **Table S4** Comparison of the performance of PLXSG hydrogel with reported  
37 hydrogel flexible strain sensors

38

39

| <b>Hydrogel</b>            | <b>Conductivity<br/>(S/cm)</b> | <b>Stress<br/>(MPa)</b> | <b>GF</b> |
|----------------------------|--------------------------------|-------------------------|-----------|
| <b>PVA/SBMA/2HEMA</b>      | 0.0458                         | 0.376                   | 3.356     |
| <b>PAAm/c-PAAm</b>         | 0.0114                         | 0.142                   | 1.24      |
| <b>PAM/SA/MXene/sucros</b> | 0.0087                         | 0.082                   | 1.768     |
| <b>e</b>                   |                                |                         |           |
| <b>PVA/GA /PANi</b>        | 0.0017                         | 0.693                   | 2.5       |
| <b>MP/FeCl3</b>            | 0.15                           | 1.5                     | 2.02      |
| <b>PAAm/FH</b>             | 0.0668                         | 0.099                   | 2.06      |
| <b>This work</b>           | 0.768                          | 1.8                     | 3.623     |

40

41 **Table S5** Comparison of the performance of PLXSG hydrogel with  
 42 reported conductive materials for strain sensing

| <b>Material</b>                                             | <b>GF</b>              | <b>Stress<br/>(MPa)</b> | <b>Strain<br/>(%)</b>      | <b>Available<br/>temperatur<br/>e range (°C)</b> | <b>Ref.</b>  |
|-------------------------------------------------------------|------------------------|-------------------------|----------------------------|--------------------------------------------------|--------------|
| <b>Graphene/Silicone rubber</b>                             | >143                   | 6.92                    | 465                        | /                                                | 1            |
| <b>Pmc/CS/f-Fe<sub>3</sub>O<sub>4</sub>-Fe<sup>3+</sup></b> | 1.75                   | 2.33                    | 1158                       | /                                                | 2            |
| <b>PA/CS/ Gly / MXene</b>                                   | 3.93                   | 0.12                    | 918                        | -20 — 80                                         | 3            |
| <b>Silane modified<br/>MXene/CNF</b>                        | /                      | ~ 0.06                  | 120                        | -20 — 200                                        | 4            |
| <b>PEDOT: PSS/PDMS<br/>foam</b>                             | Piezoresistive<br>6.25 | ~ 0.04                  | Compressive<br>strain ~ 60 | 25-100                                           | 5            |
| <b>PAM/QACNF/MXene</b>                                      | 2.24                   | 0.449                   | 1706                       | /                                                | 6            |
| <b>PVA/Li<sup>+</sup>/Xan/SiO<sub>2</sub>/Gly</b>           | 3.623                  | 1.8                     | 796                        | -40 — 80                                         | This<br>work |

43 CS denotes chitosan, Gly denotes glycerol, Pmc and PA denote poly (acrylamide-co-acrylic acid),  
 44 CNF denotes cellulose nanofiber, PEDOT: PSS denotes poly(3,4-ethylenedioxythiophene)-poly  
 45 (styrene sulfonate), PDMS denotes polydimethylsiloxane, PAM denotes polyacrylamide, and QA  
 46 denotes quaternate.

47

48

49

50

51 **Table S6 Composition of PL<sub>x</sub>XSG hydrogel.**

| <b>PVA(g)</b> | <b>LiCl(g)</b> | <b>Xan(g)</b> | <b>SiO<sub>2</sub></b> | <b>Gly(g)</b> | <b>DL(g)</b> |
|---------------|----------------|---------------|------------------------|---------------|--------------|
| <b>1</b>      | <b>0</b>       | <b>0.052</b>  | <b>5wt% solution</b>   | <b>3.6</b>    | <b>3.6</b>   |
|               | <b>0.293</b>   |               |                        | <b>3.45</b>   | <b>3.45</b>  |
|               | <b>0.586</b>   |               |                        | <b>3.31</b>   | <b>3.31</b>  |
|               | <b>0.879</b>   |               |                        | <b>3.16</b>   | <b>3.16</b>  |
|               | <b>1.172</b>   |               |                        | <b>3.01</b>   | <b>3.01</b>  |

52 **Table S7 Composition of PLX<sub>x</sub>SG hydrogel.**

| <b>PVA(g)</b> | <b>LiCl(g)</b> | <b>Xan(g)</b> | <b>SiO<sub>2</sub></b> | <b>Gly(g)</b> | <b>DL(g)</b> |
|---------------|----------------|---------------|------------------------|---------------|--------------|
| <b>1</b>      | <b>0.586</b>   | <b>0.052</b>  | <b>0wt% solution</b>   | <b>3.31</b>   | <b>3.31</b>  |
|               |                |               | <b>1wt% solution</b>   |               |              |
|               |                |               | <b>5wt% solution</b>   |               |              |
|               |                |               | <b>10wt% solution</b>  |               |              |

53 **Table S8 Composition of P、PL、PLX、PLXS and PLXSG.**

| <b>PVA(g)</b> | <b>LiCl(g)</b> | <b>Xan(g)</b> | <b>SiO<sub>2</sub></b> | <b>Gly(g)</b> | <b>DL(g)</b> |
|---------------|----------------|---------------|------------------------|---------------|--------------|
| <b>1</b>      | <b>0</b>       | <b>0</b>      | <b>0wt% solution</b>   | <b>0</b>      | <b>7.61</b>  |
| <b>1</b>      | <b>0.607</b>   | <b>0</b>      | <b>0wt% solution</b>   | <b>0</b>      | <b>7.01</b>  |
| <b>1</b>      | <b>0.588</b>   | <b>0.052</b>  | <b>0wt% solution</b>   | <b>0</b>      | <b>6.97</b>  |
| <b>1</b>      | <b>0.586</b>   | <b>0.052</b>  | <b>5wt% solution</b>   | <b>0</b>      | <b>6.62</b>  |
| <b>1</b>      | <b>0.586</b>   | <b>0.052</b>  | <b>5wt% solution</b>   | <b>3.31</b>   | <b>3.31</b>  |

54

55

56

57

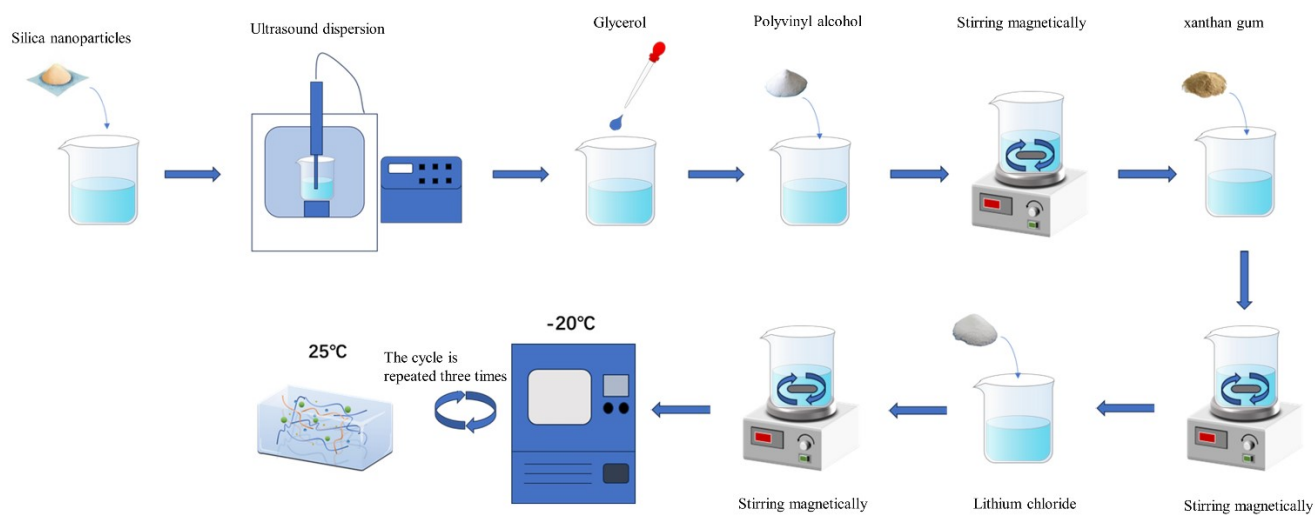

58

59

**Figure S1** PLXSG hydrogel preparation process

60



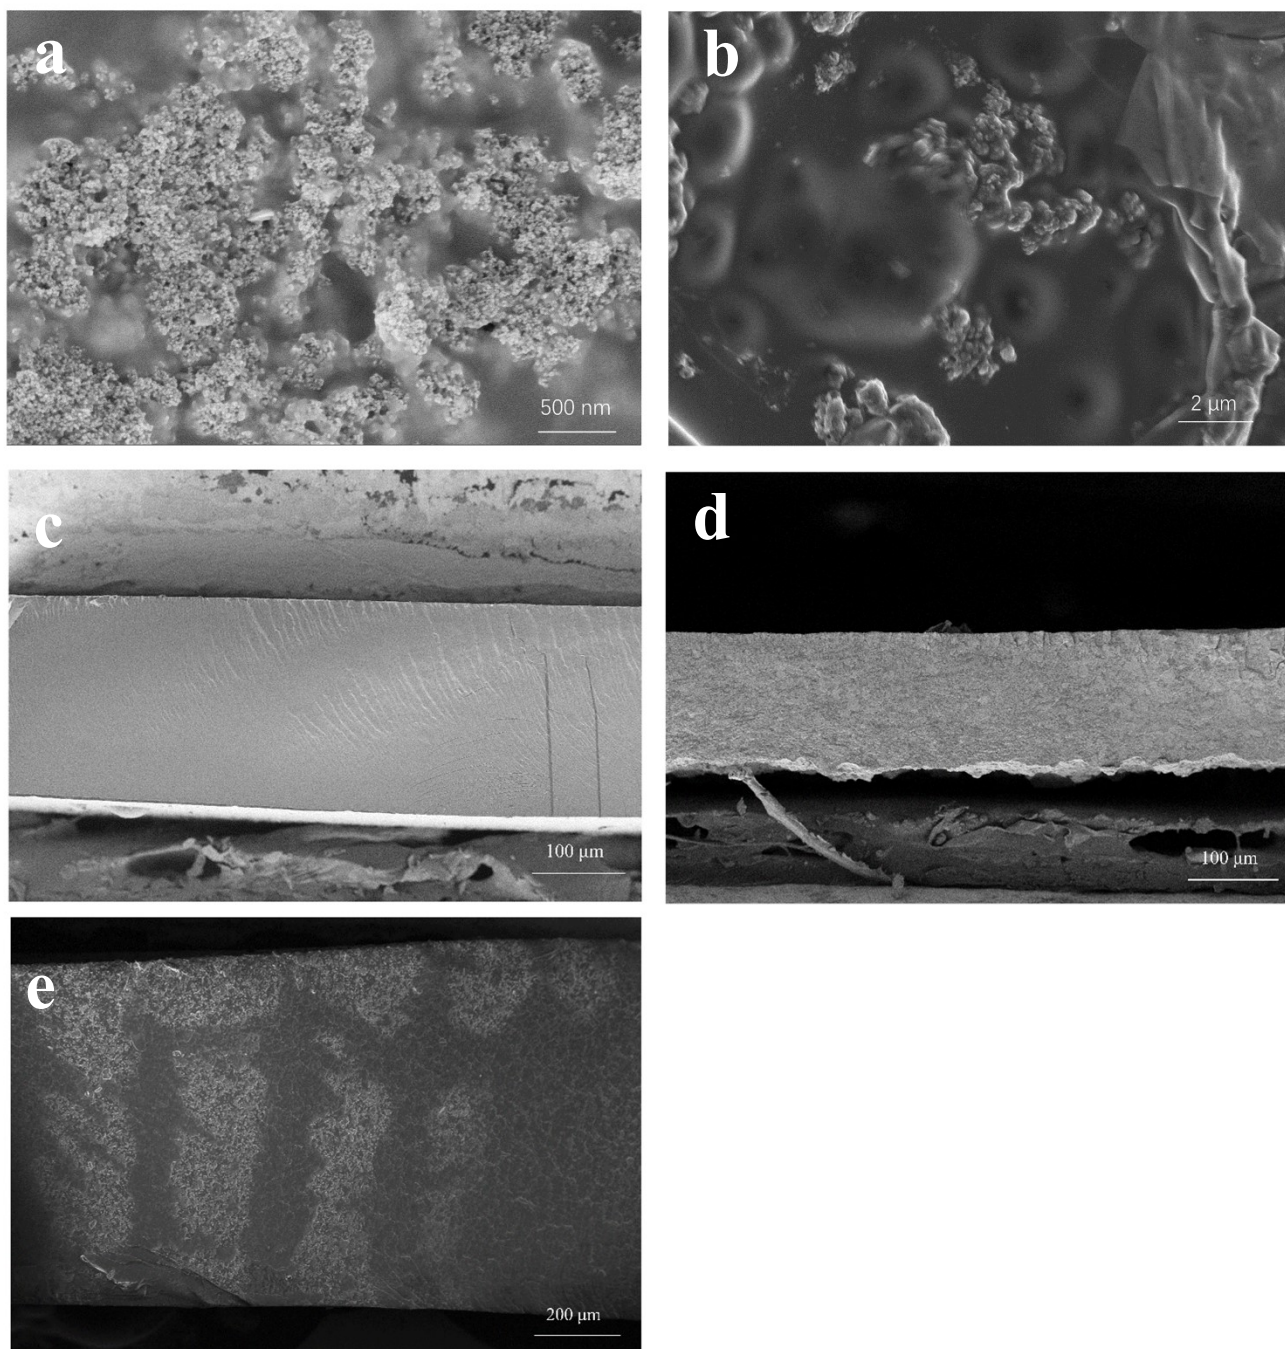

62

63 **Figure S2 (a)** SEM image of PLXS hydrogel at 500 nm scale. **(b)** SEM image of  
64 PLXSG hydrogel at 2 μm scale. **(c)** SEM image of cross section of PL hydrogel at 100  
65 μm scale. **(d)** Cross-sectional SEM image of PLXS hydrogel at 100 μm scale. **(e)** Cross-  
66 sectional SEM image of PLXSG hydrogel at 200 μm scale.

67

68

69

70

71

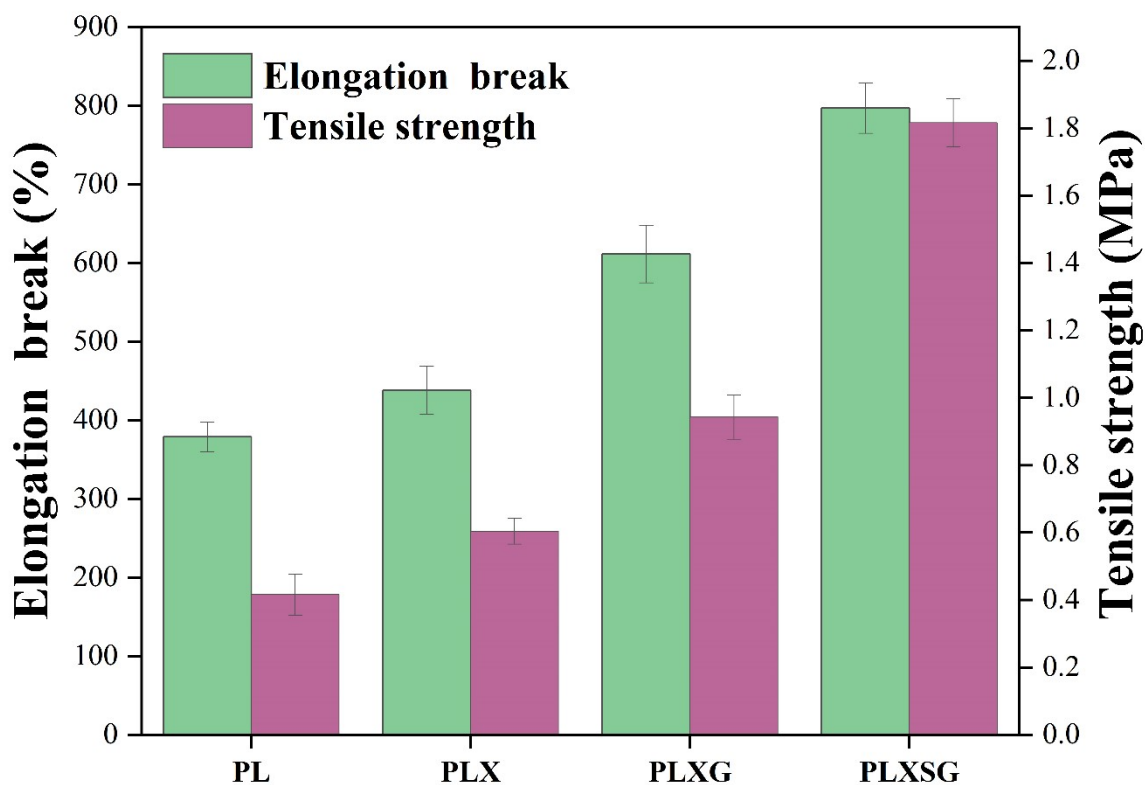

72

73 **Figure S3** Maximum strain and maximum stress of hydrogels with different fractions.

74

75 The data indicates that as xanthan, silica, and glycerol are incrementally added, there  
76 is a corresponding gradual increase in both the maximum extensibility and the  
77 maximum stress of the hydrogels. This suggests a positive enhancement of the  
78 hydrogels' mechanical properties by each additive.

79  
80  
81  
82

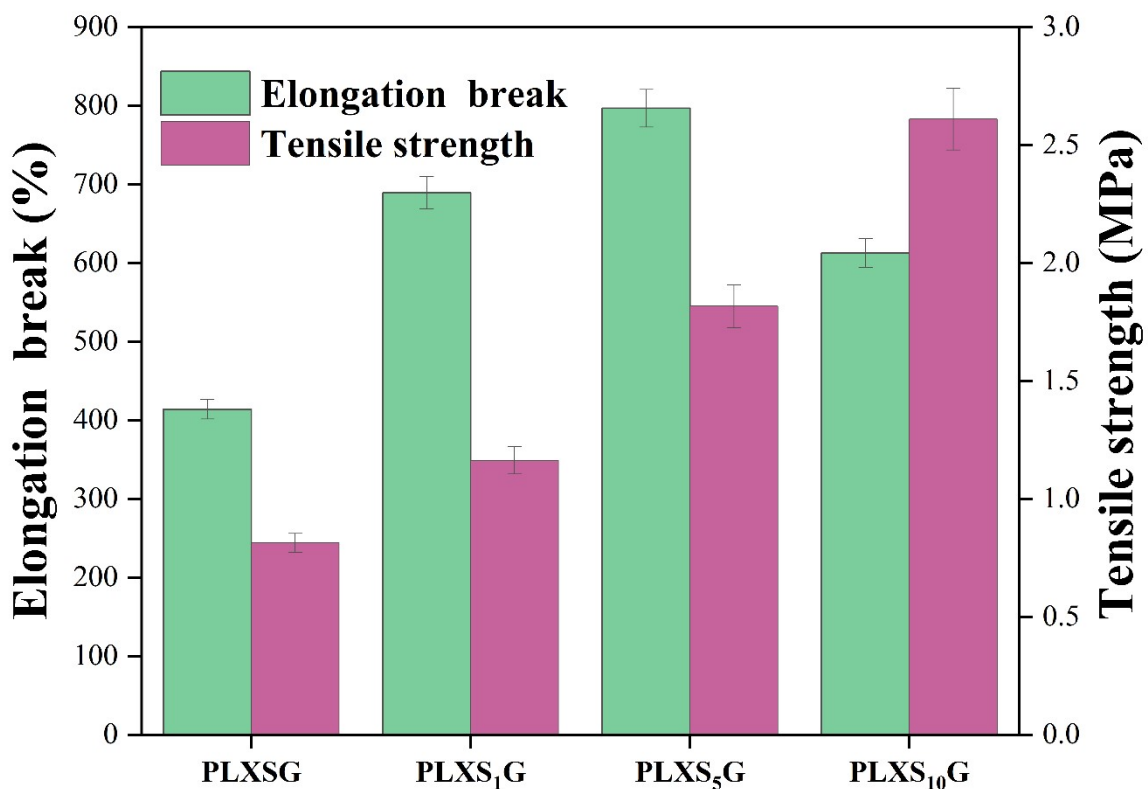

83  
84 **Figure S4** Maximum strain and maximum stress of hydrogels with different silica  
85 concentrations.  
86 As the concentration of silica rises, the tensile ratio of the hydrogel initially increases  
87 and then decreases, whereas the tensile strength consistently correlates with the  
88 increasing concentration.  
89

90  
91  
92  
93

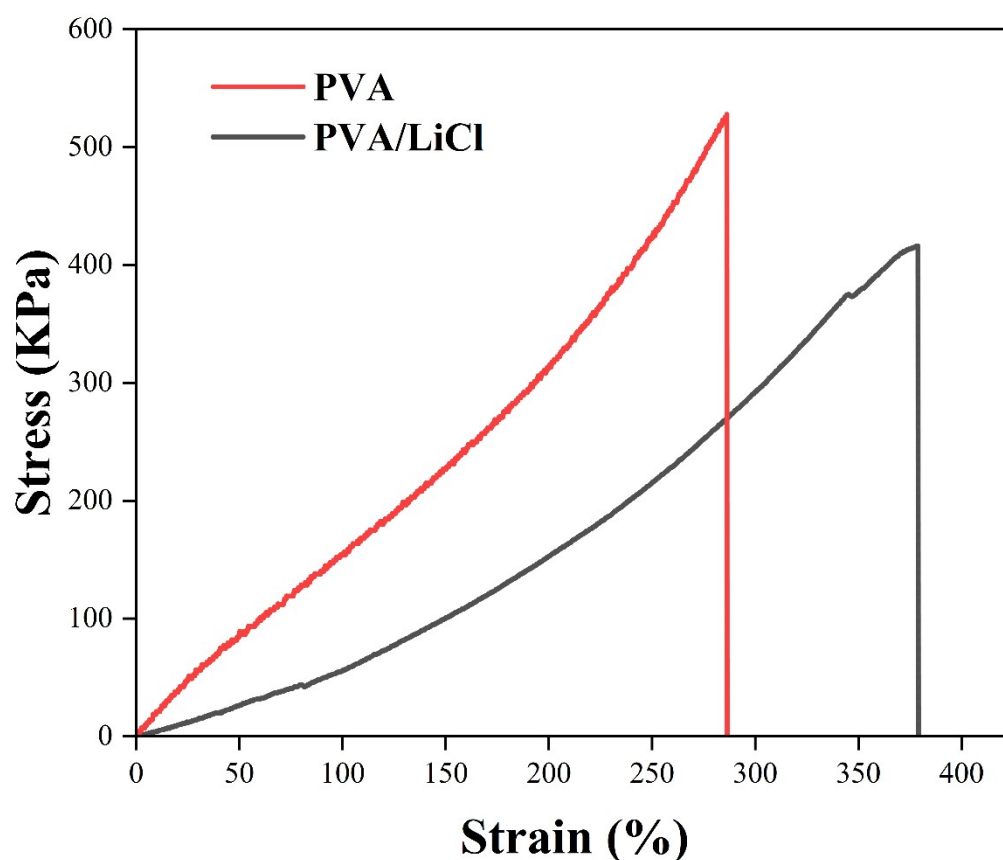

94  
95  
96  
97  
98

**Figure S5** Stress-strain curves of PVA and PVA/LiCl hydrogels.

The PVA/LiCl hydrogel exhibited improved tensile properties over the PVA hydrogel; however, its mechanical strength decreased from 0.527 MPa to 0.416 MPa.

99

100

101

102

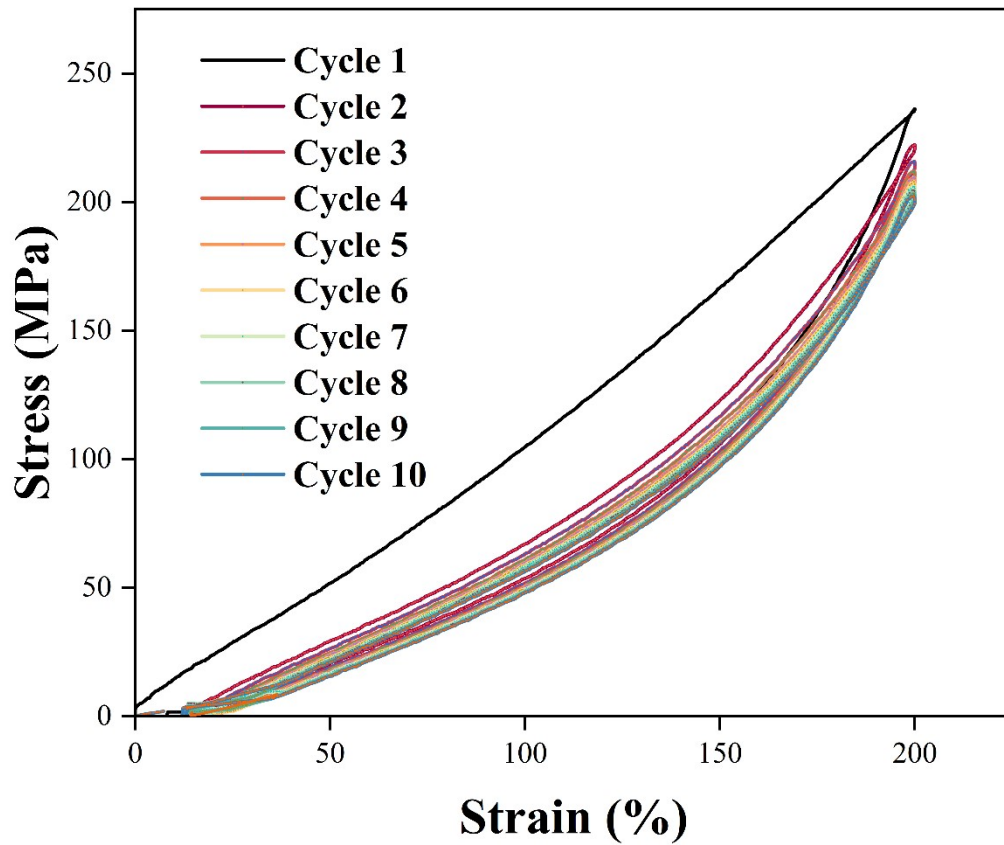

103

104 **Figure S6** Cyclic tensile stress-strain curves of PLXSG hydrogels at 200% of  
105 maximum strain.

106 The PLXSG hydrogel demonstrated superior hysteresis performance through 10 cycles  
107 of 200% tensile strain, evident from the reduced hysteresis area depicted in Fig. S6.

108

109

110

111

112

113

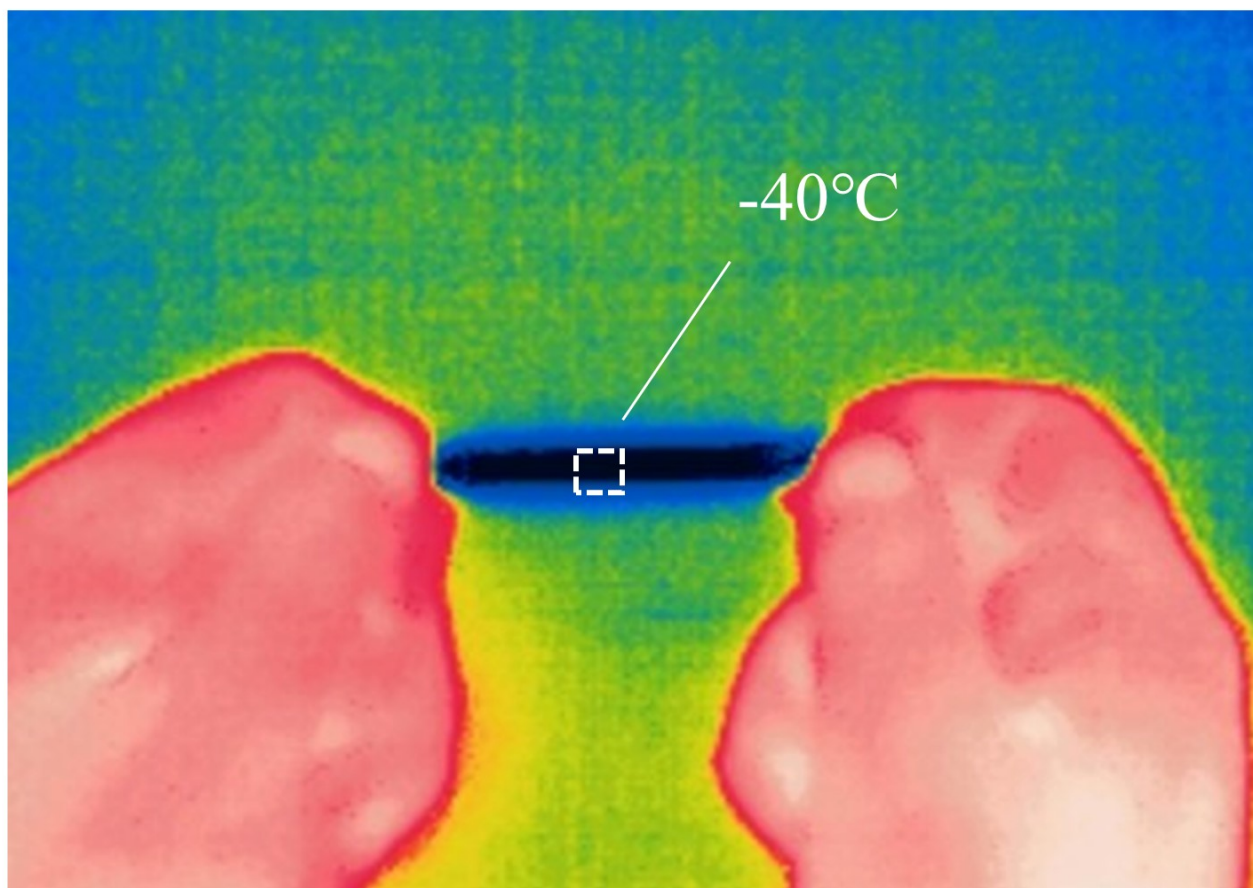

114

115 **Figure S7** Infrared thermography of PLXSG hydrogel stretched at -40°C

116

117

118

119

120

121

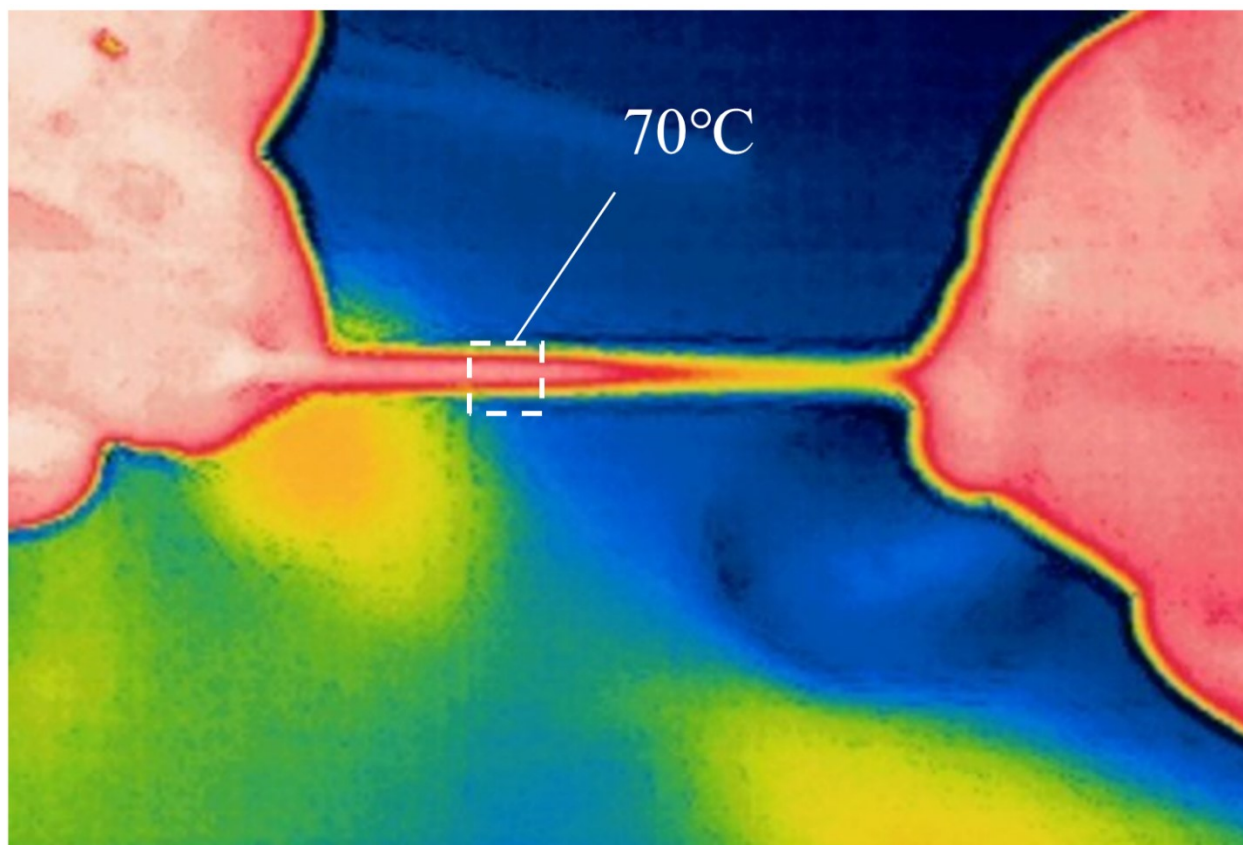

122

**Figure S8** Infrared thermogram of PLXSG hydrogel stretched at 70°C

124

125

126

127

128

129

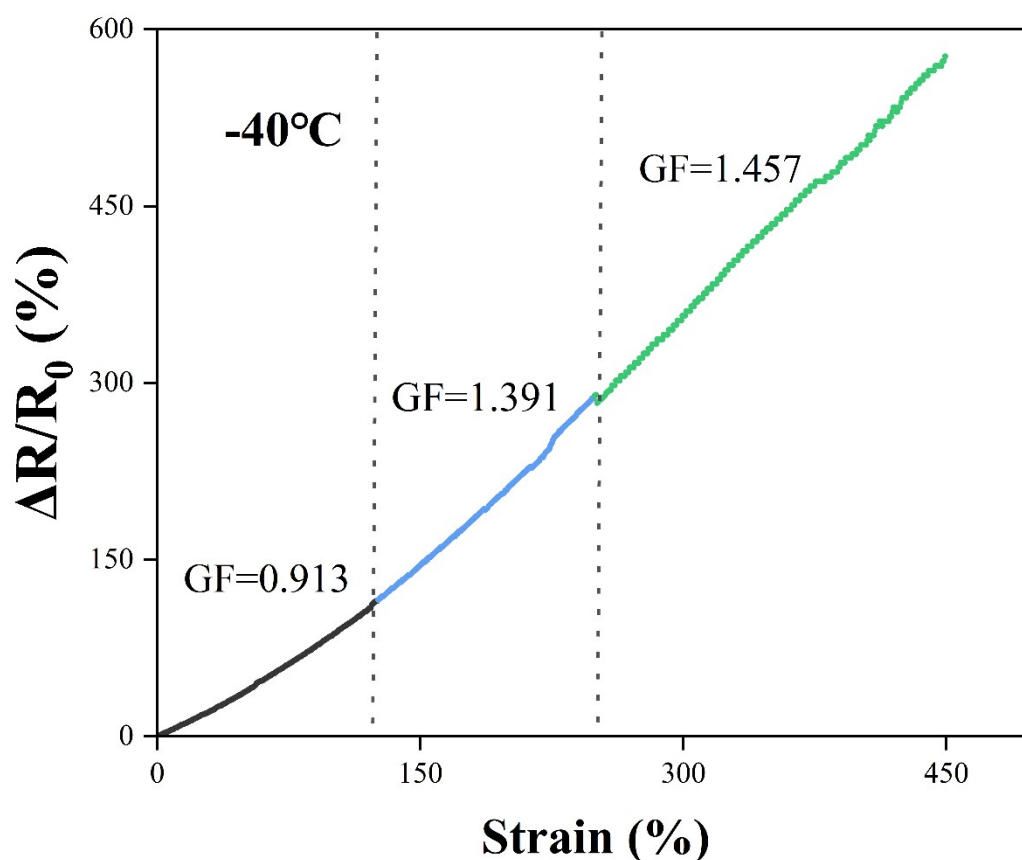

130

131 **Figure S9** PLXSG hydrogel as strain sensor GF at -40°C.

132 At 70°C, the PLXSG hydrogel exhibits a gauge factor (GF) of 1.283 for strains above

133 320% and a GF of 0.565 for strains below 180%, as shown in Figure S9.

134



135

136

137

138

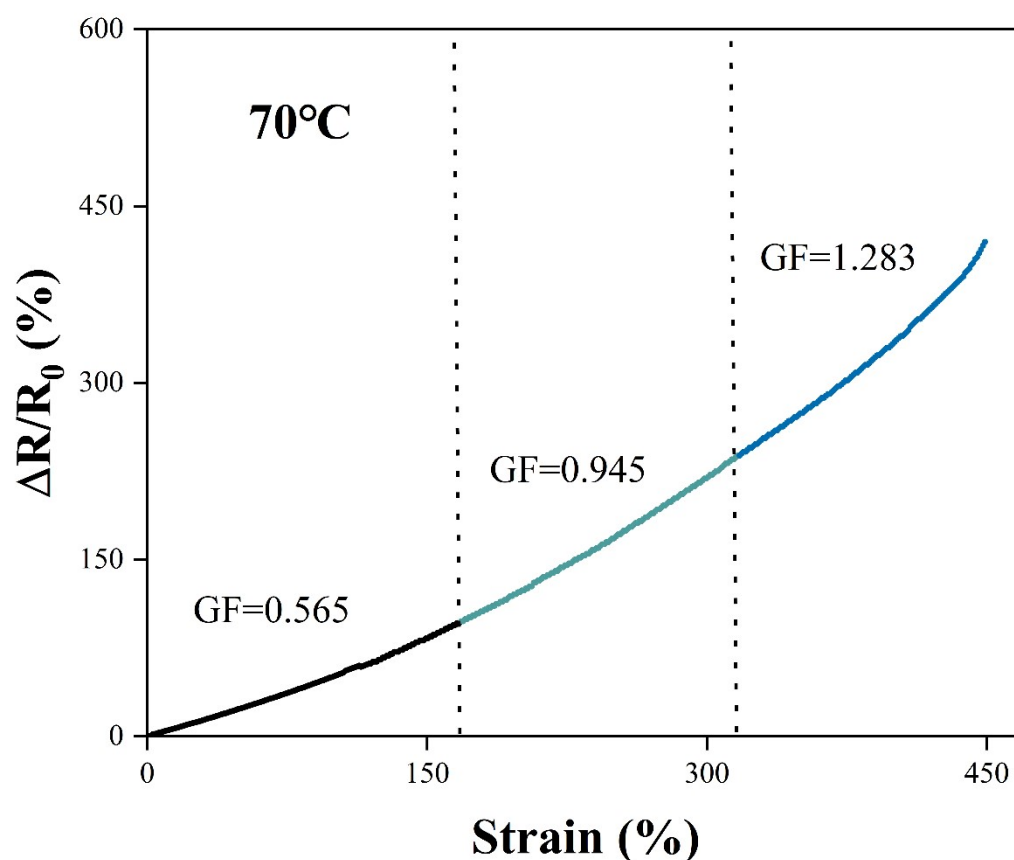

139

140 **Figure S10** PLXSG hydrogel as strain sensor GF at 70°C.

141 At -40°C, the GF is 1.457 for strains above 270% and 0.913 for strains below 130%.

142 Despite the significant reduction in GF at extreme temperatures compared to room

143 temperature, the hydrogel remains functional as a strain sensor.

144

145

146

147

148

149

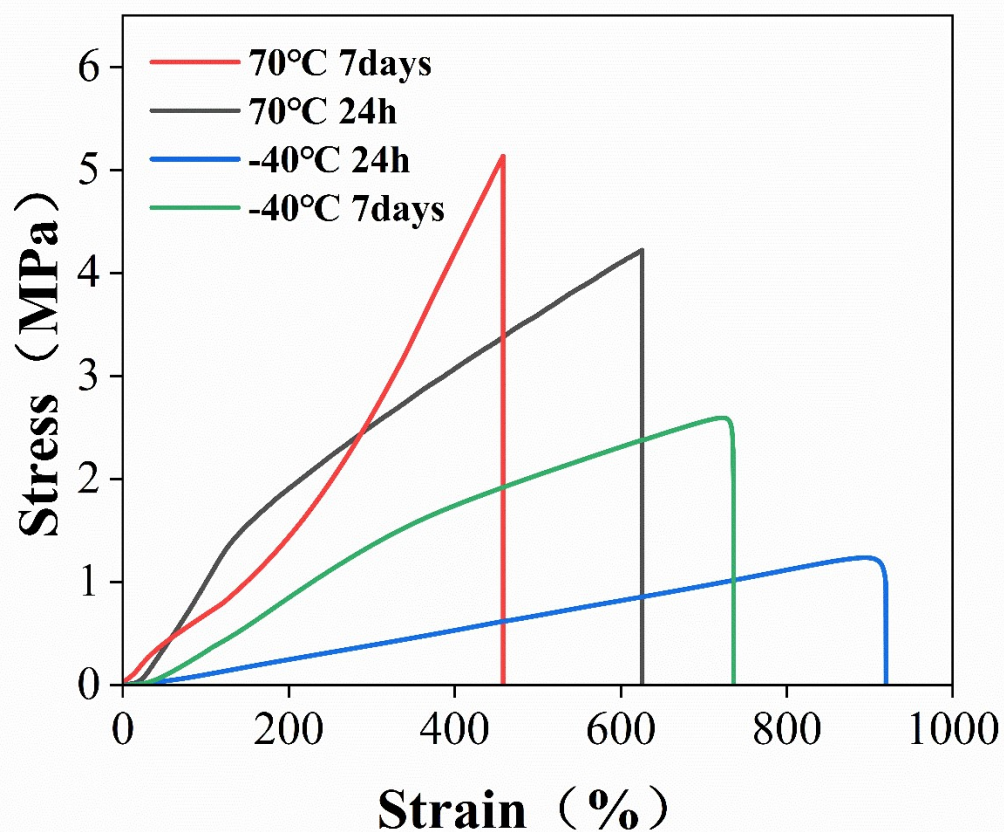

150

151 **Figure S11** The stress-strain curves of PLXSG hydrogels were analyzed after being  
152 placed at 70°C and -40°C for 24 hours and 7 days.

153

154

155

156

157

158

159

160

161

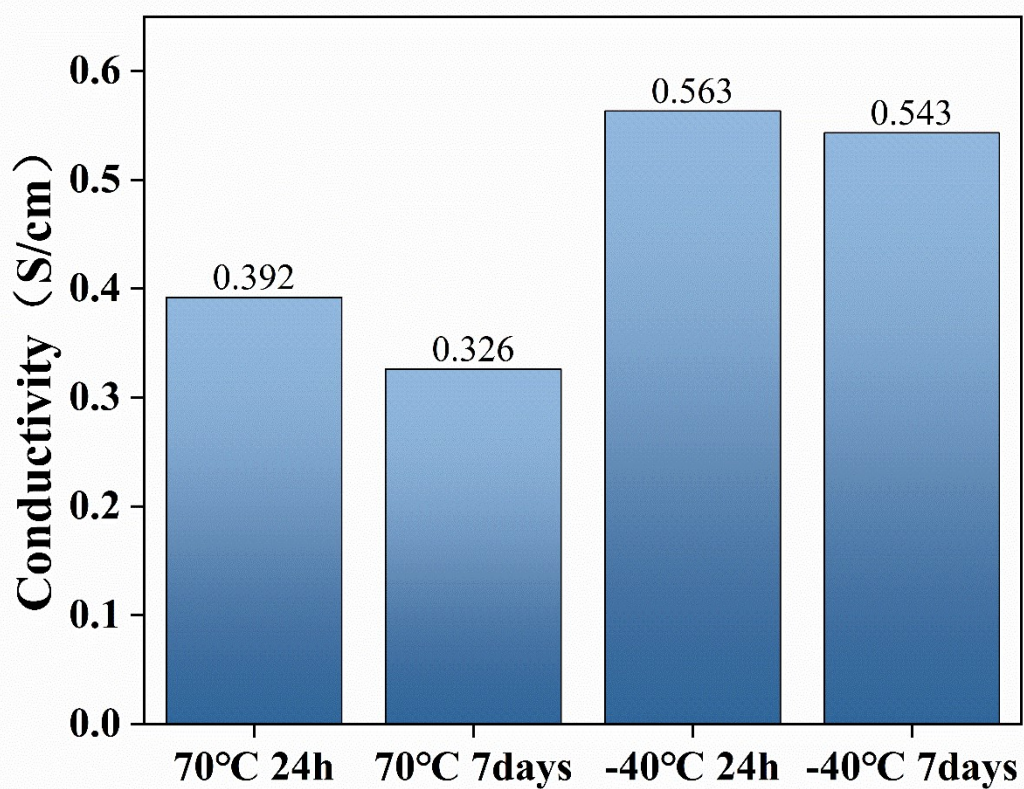

162

163 **Figure S12** Comparison of the conductivity of PLXSG hydrogels after 24 hours and 7  
164 days at 70°C and -40°C.

165

166

167

168

169

170

171

172

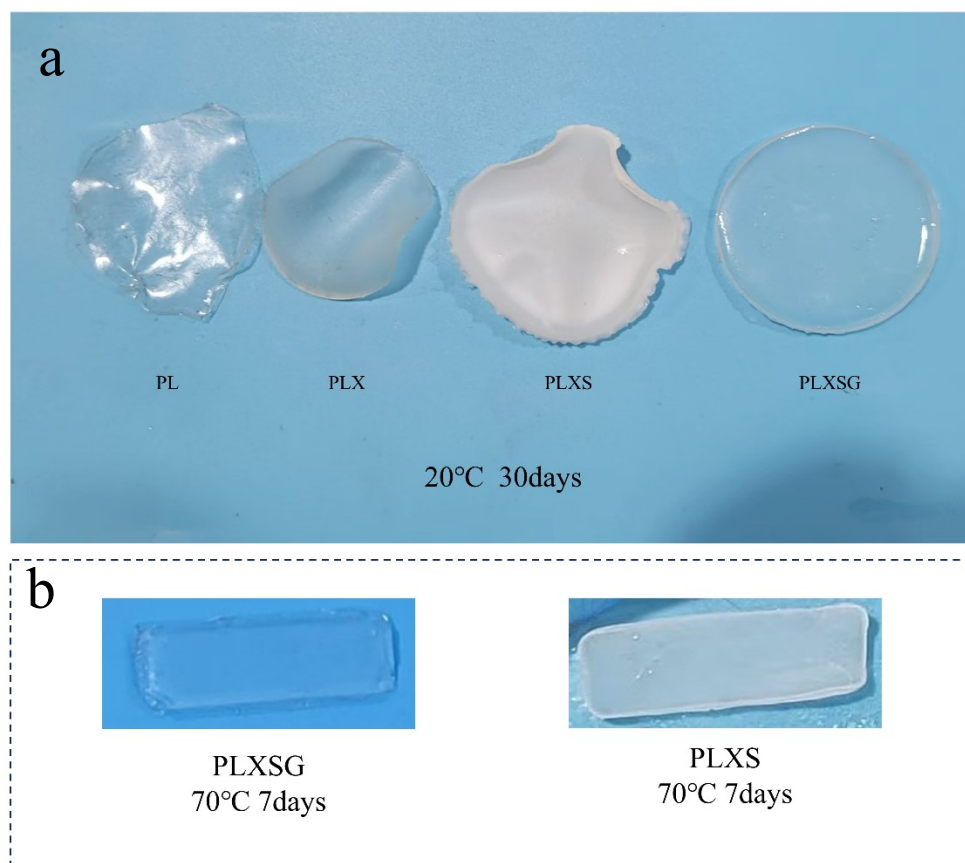

173

174 **Figure S13 a** Photographs of PL, PLX, PLXS, and PLXSG hydrogels after 30 days at

175 20°C. **Figure S13 b** Photographs of PLXSG and PLXS hydrogels after 7 days at

176 70°C.

177

178

179

180

181

182

183

184

185

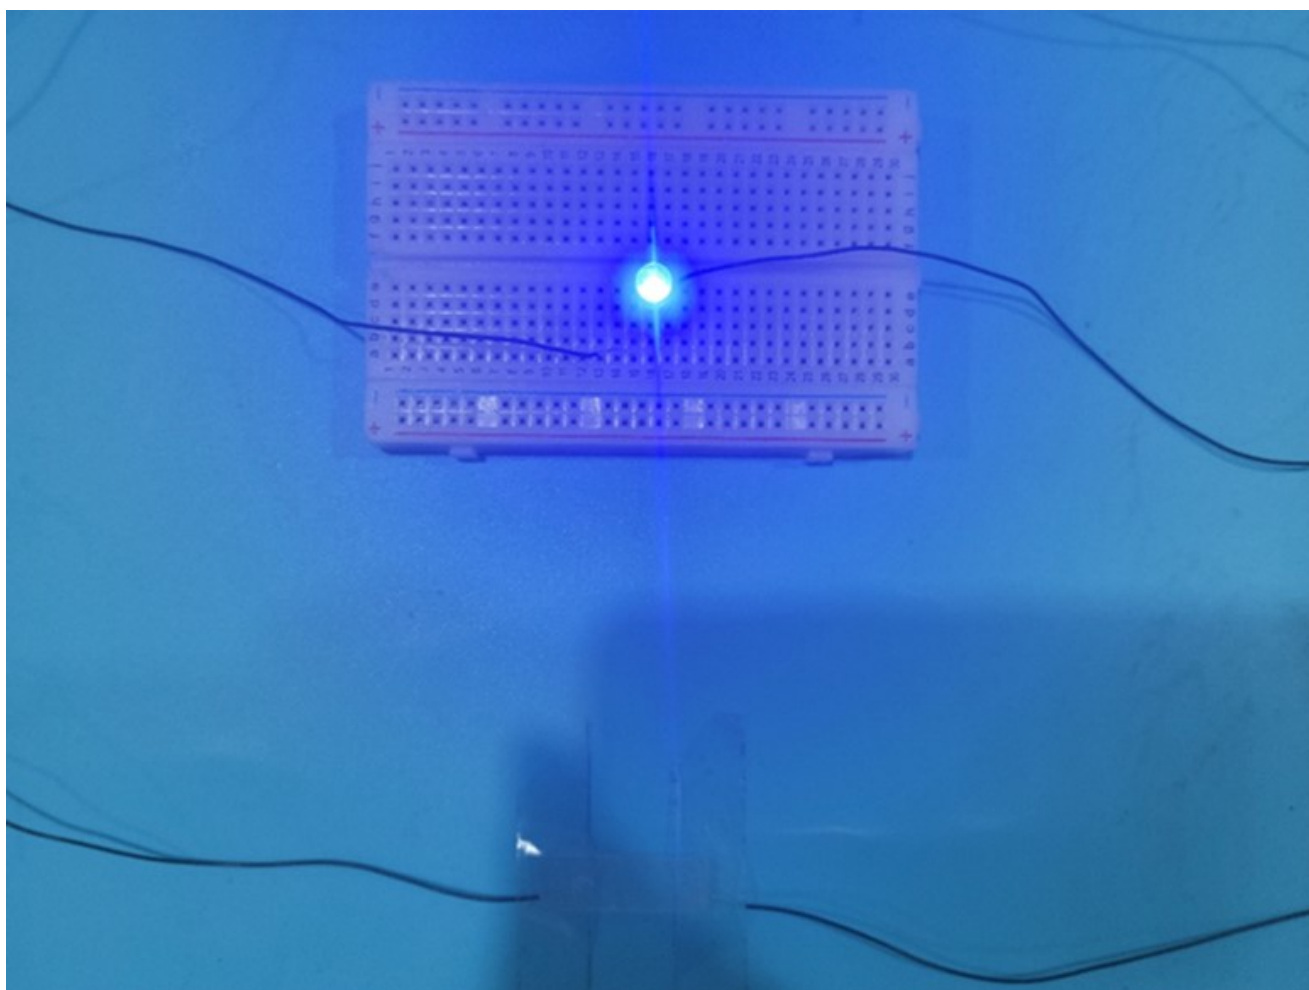

186

187 **Figure S14** PLXSG hydrogel illuminates LEDs at  $-40^{\circ}\text{C}$

188

189

190

191

192

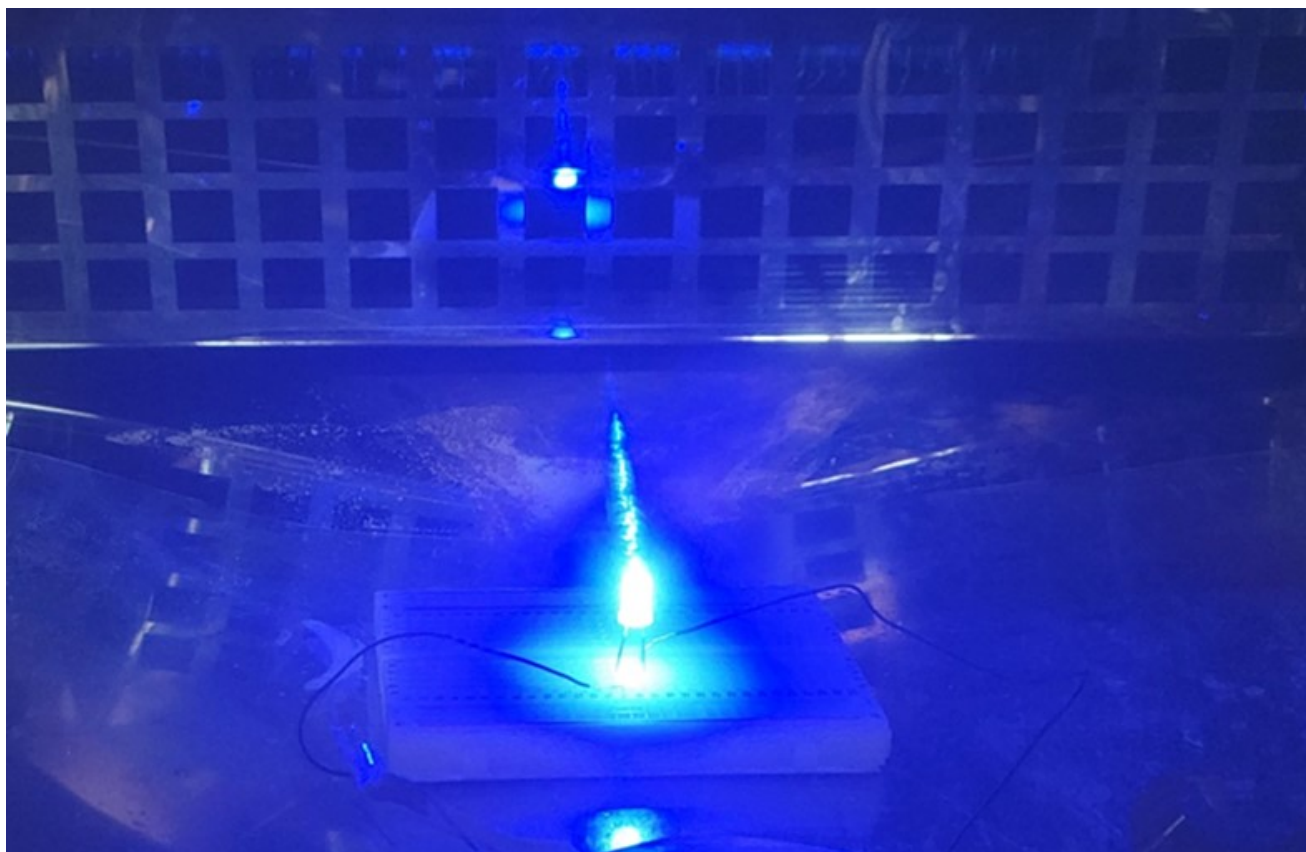

193

194

**Figure S15** PLXSG hydrogel illuminates LEDs at 70°C

195

196

197

198

199

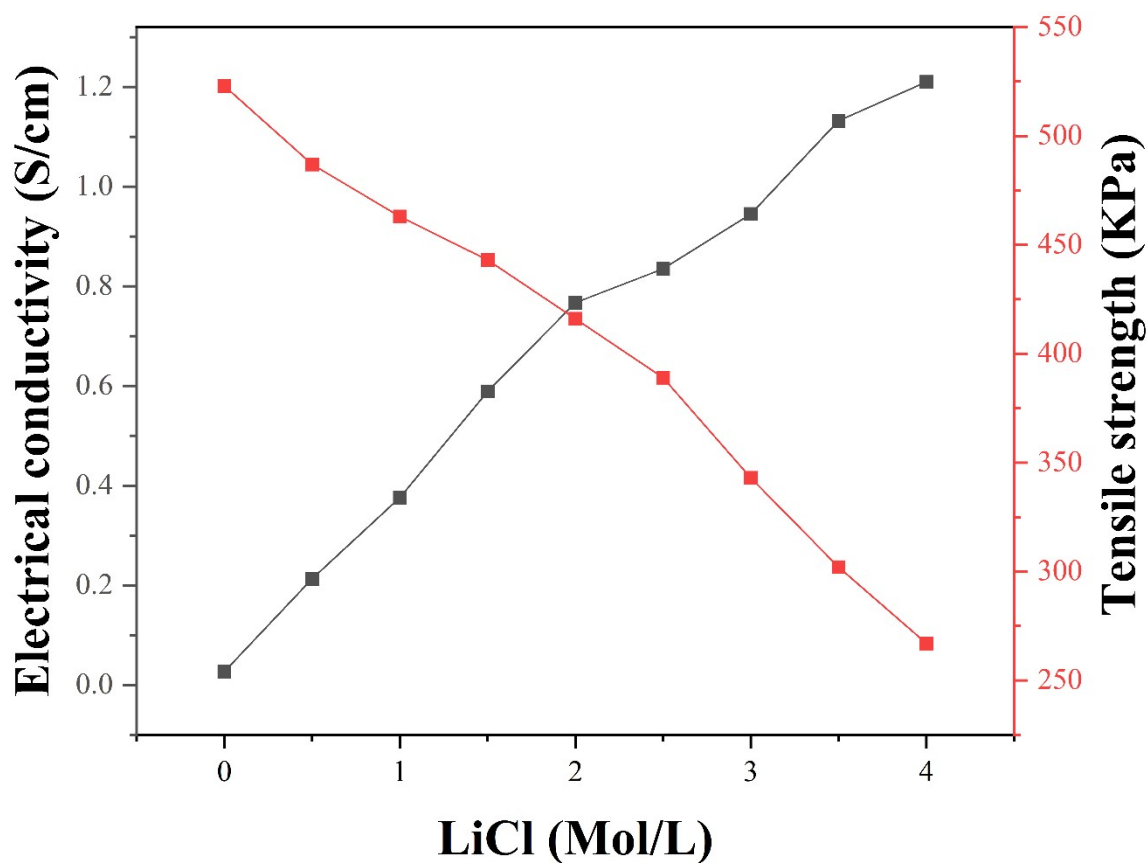

200

201 **Figure S16** Conductivity and tensile strength of hydrogels with different lithium  
202 chloride concentrations.

203 As the lithium chloride concentration increases, there is a corresponding gradual  
204 increase in hydrogel conductivity and a decrease in tensile strength. An optimal balance  
205 between these properties is attained at a 2 M concentration.

206

207

208

209

210

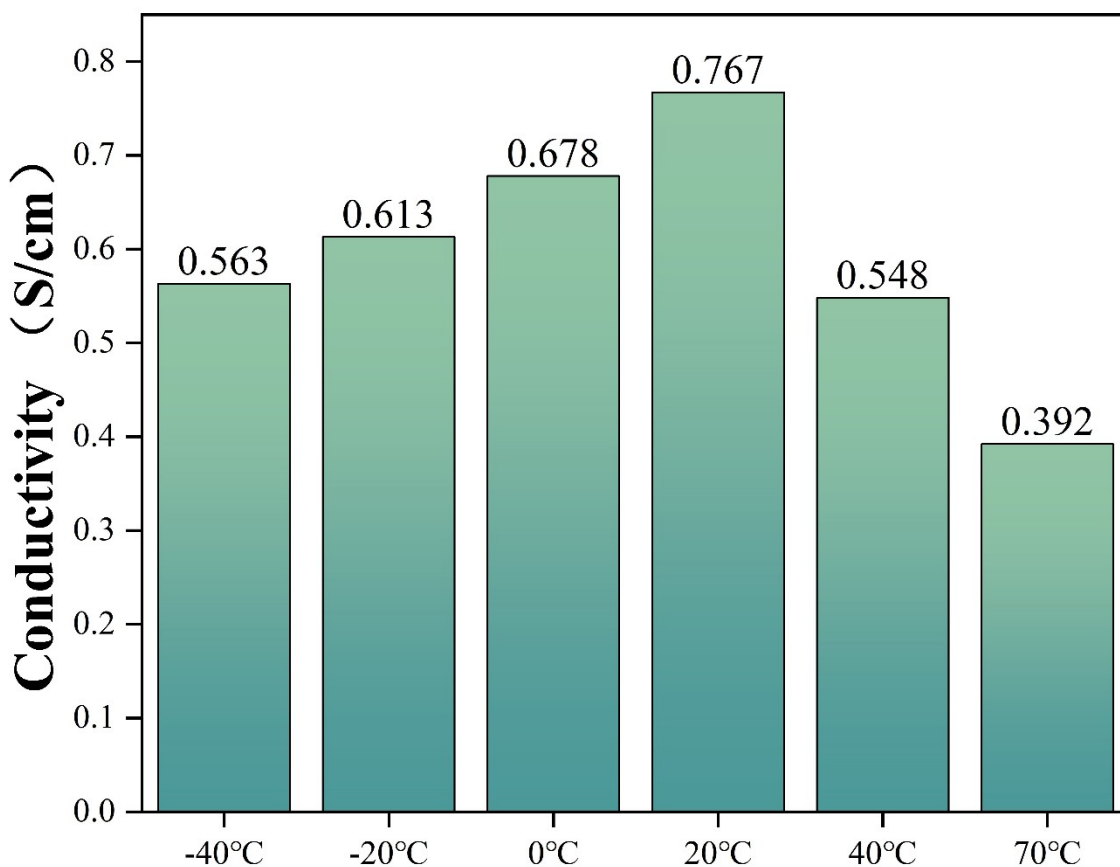

211

212 **Figure S17** Change in conductivity of hydrogels at different temperatures.

213 The conductivity of PLXSG hydrogels significantly drops as the temperature rises,  
214 halving at 70 degrees Celsius compared to room temperature. Additionally,  
215 conductivity diminishes slowly at lower temperatures, but the decline is more gradual  
216 than at higher temperatures.

217



218

219

220

221

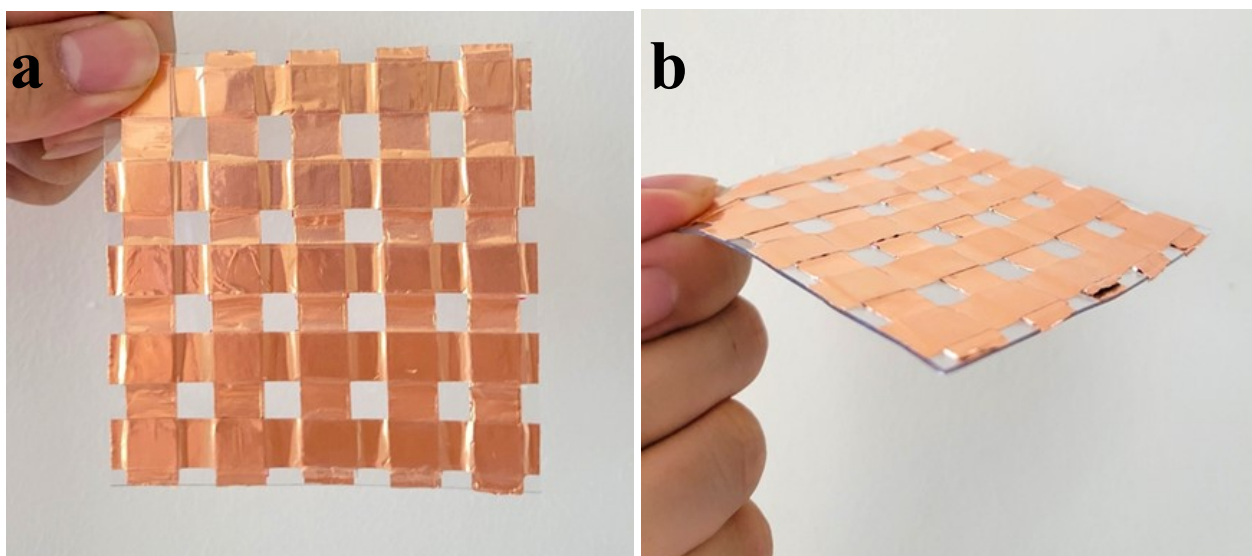

222

223

**Figure S18** hydrogel sensor array.

224

225

226 1 H. Yang, X. Yao, Z. Zheng, L. Gong, L. Yuan, Y. Yuan and Y. Liu, *Compos Sci Technol*, 2018, 167,  
227 371–378.

228 2 S.-N. Li, B. Li, Z.-R. Yu, L.-X. Gong, Q.-Q. Xia, Y. Feng, D. Jia, Y. Zhou and L.-C. Tang, *Compos Sci*  
229 *Technol*, 2020, 195, 108173.

230 3 S.-N. Li, Z.-R. Yu, B.-F. Guo, K.-Y. Guo, Y. Li, L.-X. Gong, L. Zhao, J. Bae and L.-C. Tang, *Nano Energy*,  
231 2021, 90, 106502.

232 4 H.-Y. Chen, Z.-Y. Chen, M. Mao, Y.-Y. Wu, F. Yang, L.-X. Gong, L. Zhao, C.-F. Cao, P. Song, J.-F. Gao,  
233 G.-D. Zhang, Y.-Q. Shi, K. Cao and L.-C. Tang, *Adv Funct Mater*, 2023, 33, 2304927.

234 5 F. Nie, Y.-L. Gu, L. Zhao, L.-T. Li, F.-X. Shen, J. Song, J. Liu, G.-D. Zhang, J.-F. Gao, P. Song, Y. Shi and  
235 L.-C. Tang, *Advanced Sensor Research*, 2024, 3, 2300140.

236 6 Q.-Y. Ni, X.-F. He, J.-L. Zhou, Y.-Q. Yang, Z.-F. Zeng, P.-F. Mao, Y.-H. Luo, J.-M. Xu, B. Jiang, Q. Wu, B.  
237 Wang, Y.-Q. Qin, L.-X. Gong, L.-C. Tang and S.-N. Li, *J Mater Sci Technol*, 2024, 191, 181–191.

238
